# Supplementary material for: A multi-omics database of buffaloes from Yangtze valley reveals diversity of water buffalo (Bubalus bubalis)
Source: PubMed Central journal article supplement — Sci Data. 2024 Dec 18;11:1375. doi: 10.1038/s41597-024-04246-4 (PMC11655523; doi:10.1038/s41597-024-04246-4), 2024-12-18
Supplement: 41597_2024_4246_MOESM1_ESM.pdf [file 41597_2024_4246_MOESM1_ESM.pdf]

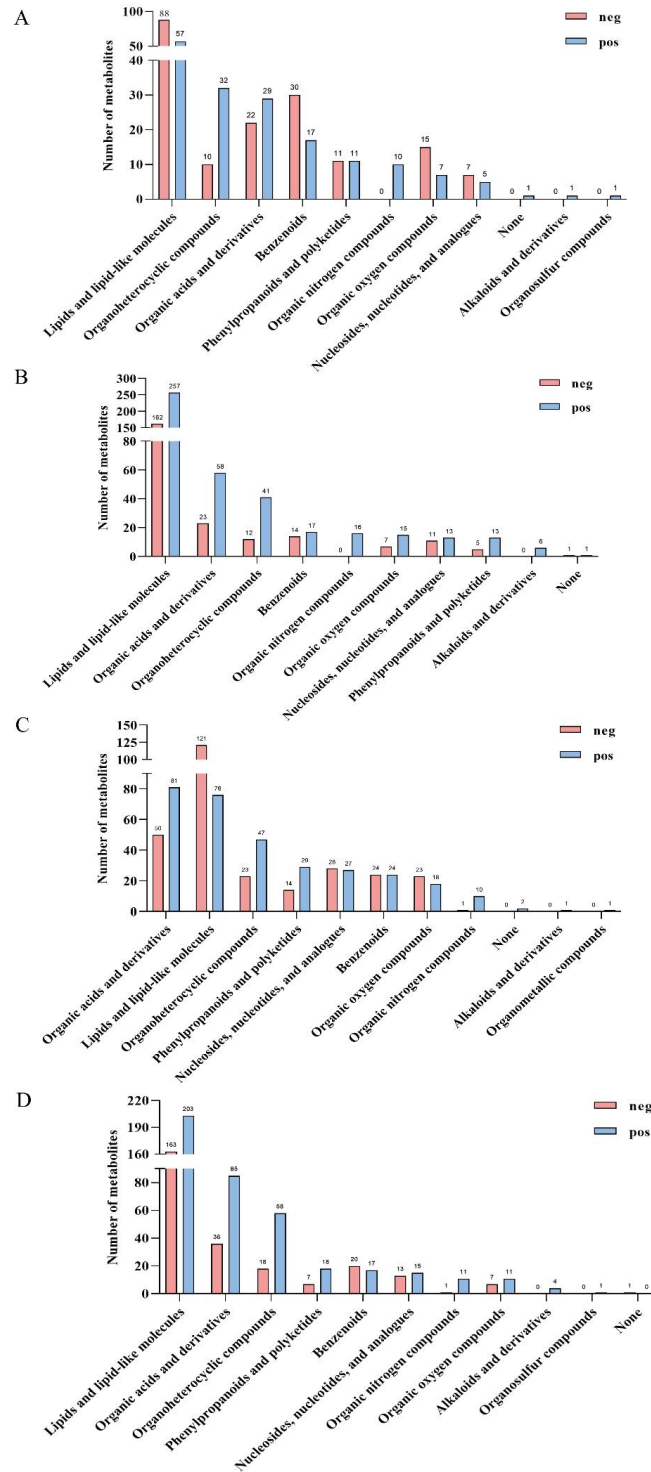

Supplementary figure S1: Classification of metabolites in the positive and negative ion modes from rumen fluid and plasma of Xuyi mountain (XYM, n = 7) and Haizi (HZ, n = 10) buffaloes. (A) Rumens fluid from HZ buffalo. (B) Plasma from HZ buffalo. (C) Rumens fluid from XYM buffalo. (D) Plasma from XYM buffalo.

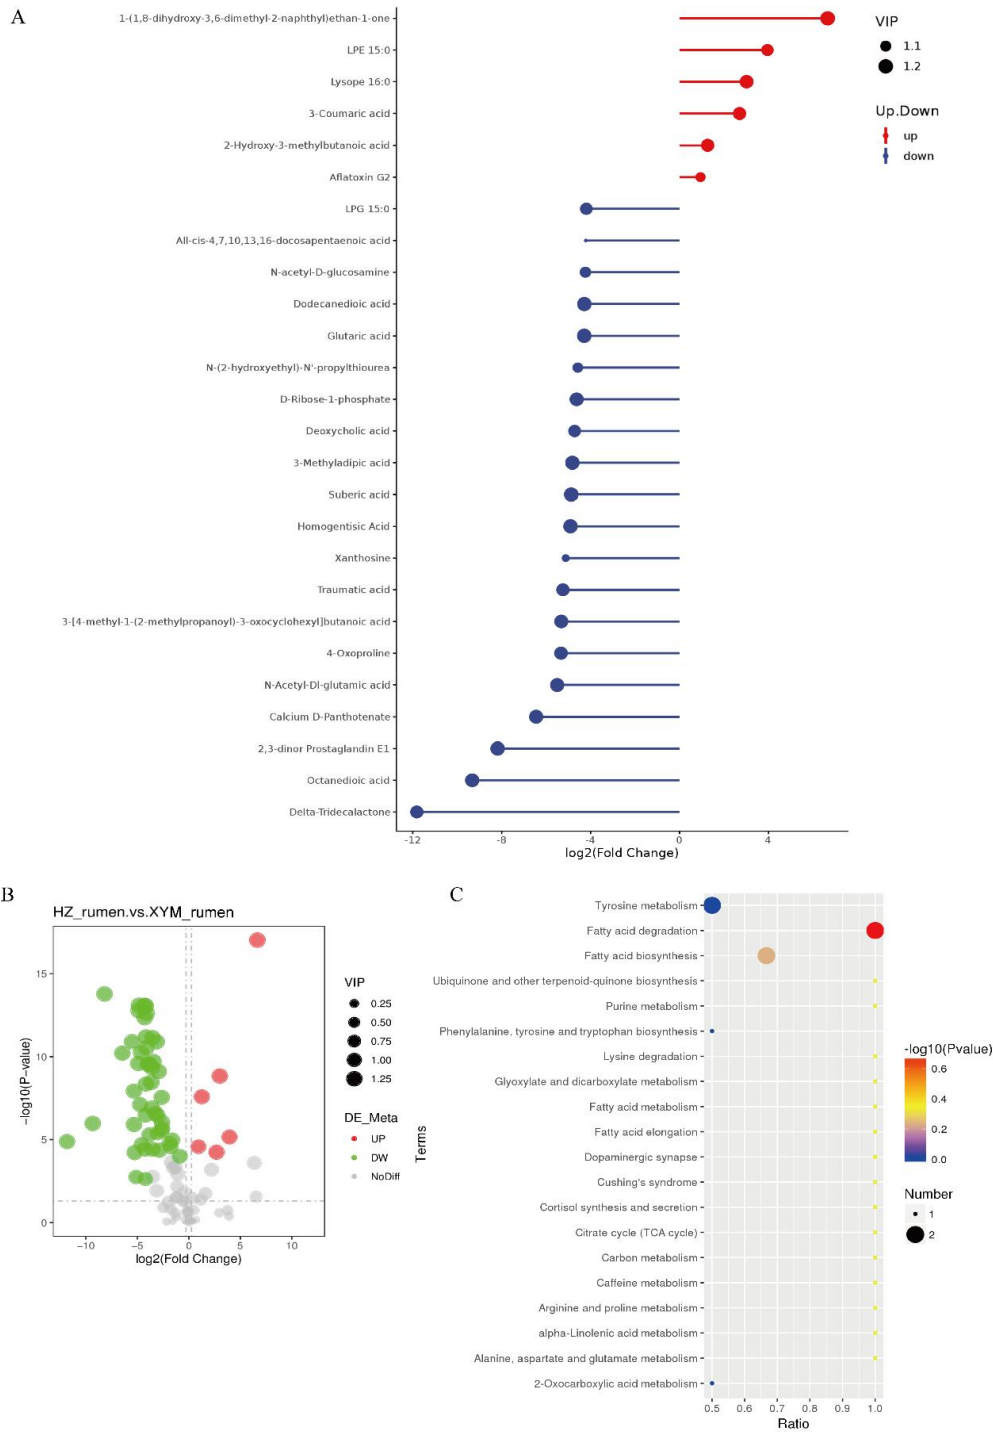

Supplementary figure S2: Differential metabolite identifications of rumen liquids between Xuyi mountain (n = 7) and Haizi (n = 10) buffaloes in the negative ion mode. (A) VIP values and Fold change of metabolites. (B) Volcano plots of differential metabolites based on log<sub>2</sub>Fold change and -log<sub>10</sub>P-value. (C) KEGG pathway enrichment of differential metabolites. The size of the black points indicates the number of differential metabolites enriched.

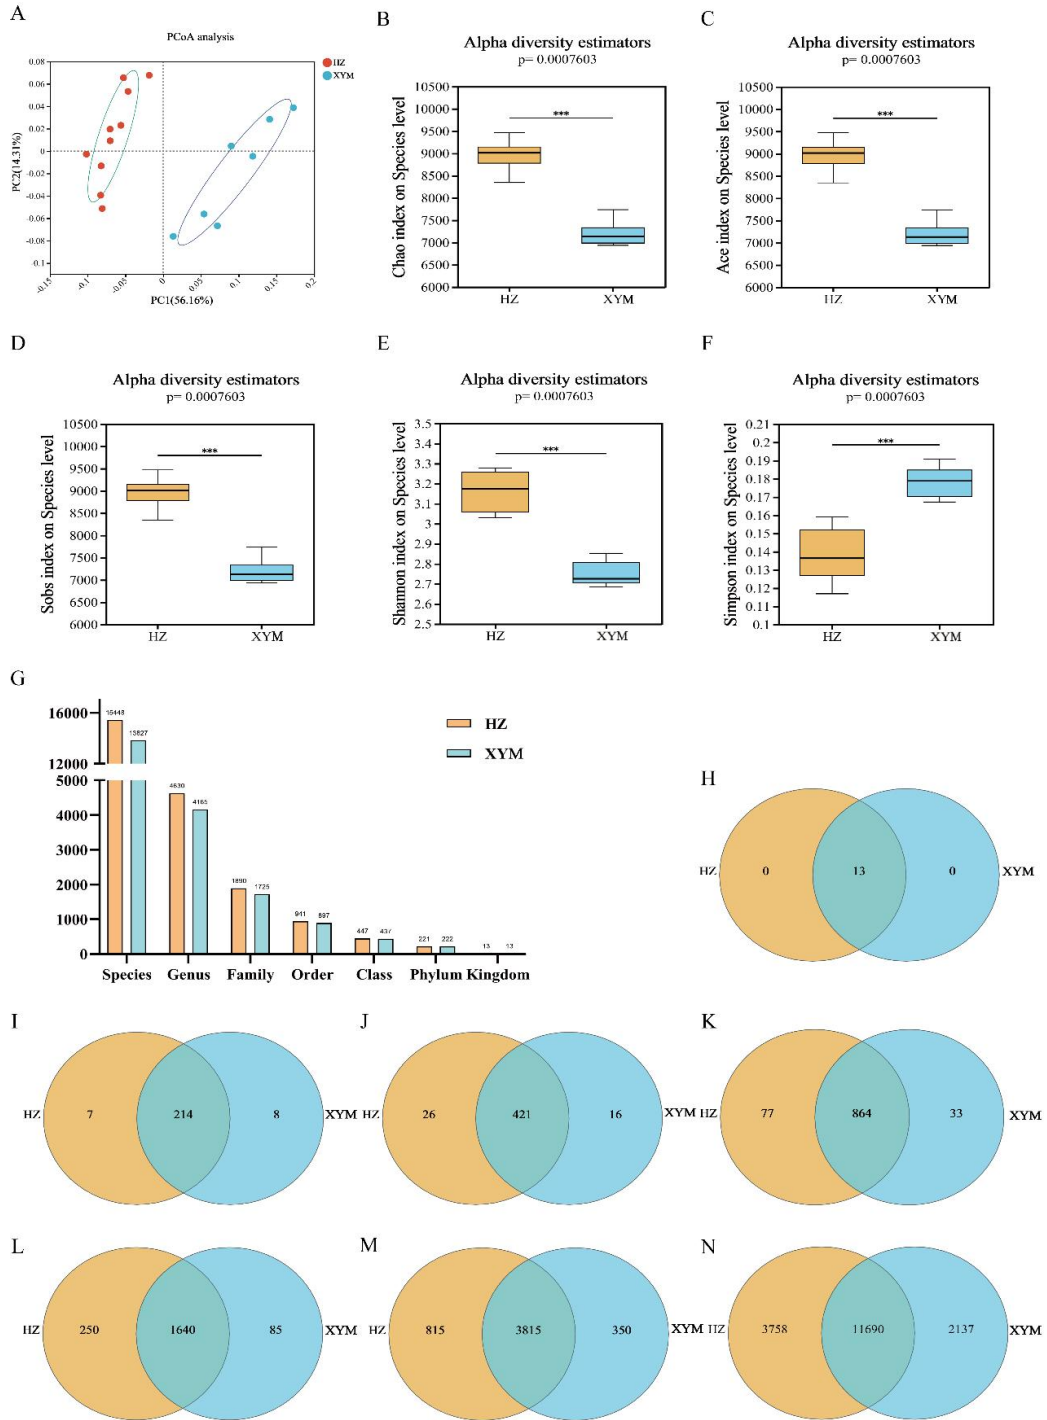

Supplementary figure S3: Diversity and species compositions of rumen microflora of Xuyi mountain ( $n = 7$ ) and Haizi ( $n = 10$ ) buffaloes. (A) PCoA results. Boxplot of the  $\alpha$  diversity for (B) Chao, (C) Ace, (D) Sobs, and (E) Shannon index. (G) Histogram of microbial numbers for different classifications. Venn diagram of abundances on (H) Kingdom, (I) phylum, (J) class, (K) order, (L) family, (M) genus, and (N) species levels.

**Supplementary table S1: Statistical description of RNA-seq reads of Xuyi mountain (n = 7) and Haizi (n = 10) buffaloes**

| Sample | Another name | Raw Reads | Clean Reads | Raw Base(G) | Clean Base(G) | Effective (%) | Error (%) | Q20 (%) | Q30 (%) | GC (%) |
|--------|--------------|-----------|-------------|-------------|---------------|---------------|-----------|---------|---------|--------|
| HZ-1   |              | 41904     | 40114       |             |               |               |           | 96.4    | 90.7    | 52.    |
|        |              | 524       | 976         | 6.29        | 6.02          | 95.73         | 0.03      | 2       | 4       | 88     |
| HZ-2   |              | 47367     | 45746       |             |               |               |           | 96.4    | 90.8    | 51.    |
|        |              | 708       | 316         | 7.11        | 6.86          | 96.58         | 0.03      | 9       | 5       | 69     |
| HZ-3   |              | 46566     | 44455       |             |               |               |           | 96.4    | 90.8    | 51.    |
|        |              | 610       | 962         | 6.98        | 6.67          | 95.47         | 0.03      | 5       | 1       | 77     |
| HZ-4   |              | 47423     | 44580       |             |               |               |           | 96.6    | 91.3    | 53.    |
|        |              | 706       | 162         | 7.11        | 6.69          | 94.00         | 0.03      | 4       | 2       | 45     |
| HZ-5   |              | 46259     | 44147       |             |               |               |           | 96.3    | 90.7    | 52.    |
|        |              | 796       | 264         | 6.94        | 6.62          | 95.43         | 0.03      | 8       | 2       | 94     |
| HZ-6   |              | 40701     | 38191       |             |               |               |           | 96.8    | 91.7    | 51.    |
|        |              | 336       | 676         | 6.11        | 5.73          | 93.83         | 0.03      | 9       | 0       | 37     |
| HZ-7   |              | 44632     | 41288       |             |               |               |           | 96.5    | 90.9    | 50.    |
|        |              | 368       | 488         | 6.69        | 6.19          | 92.51         | 0.03      | 6       | 4       | 37     |
| HZ-8   |              | 44610     | 42165       |             |               |               |           | 96.5    | 91.1    | 52.    |
|        |              | 204       | 042         | 6.69        | 6.32          | 94.52         | 0.03      | 7       | 7       | 72     |
| HZ-9   |              | 49114     | 46425       |             |               |               |           | 96.6    | 91.3    | 52.    |
|        |              | 878       | 358         | 7.37        | 6.96          | 94.52         | 0.03      | 7       | 0       | 82     |
| HZ-10  |              | 45213     | 43387       |             |               |               |           | 96.8    | 91.7    | 51.    |
|        |              | 004       | 356         | 6.78        | 6.51          | 95.96         | 0.03      | 7       | 7       | 14     |
| XY_1   | XY-886       | 50155     | 47612       |             |               |               |           | 96.3    | 90.8    | 49.    |
|        |              | 642       | 758         | 7.52        | 7.14          | 94.93         | 0.03      | 8       | 6       | 08     |
| XY_2   | XY-888       | 50280     | 47775       |             |               |               |           | 96.3    | 90.9    | 51.    |
|        |              | 842       | 896         | 7.54        | 7.17          | 95.02         | 0.03      | 8       | 6       | 41     |
| XY_3   | XY-884       | 47218     | 45750       |             |               |               |           | 96.5    | 91.2    | 52.    |
|        |              | 492       | 336         | 7.08        | 6.86          | 96.89         | 0.03      | 2       | 7       | 60     |
| XY_4   | XY-609       | 52707     | 50258       |             |               |               |           | 96.6    | 91.5    | 52.    |
|        |              | 398       | 002         | 7.91        | 7.54          | 95.35         | 0.03      | 8       | 5       | 12     |
| XY_5   | XY-604       | 49787     | 48038       |             |               |               |           | 96.4    | 91.0    | 52.    |
|        |              | 924       | 424         | 7.47        | 7.21          | 96.49         | 0.03      | 2       | 4       | 46     |
| XY_6   | XY-801       | 46495     | 45010       |             |               |               |           | 96.4    | 91.0    | 51.    |
|        |              | 522       | 038         | 6.97        | 6.75          | 96.81         | 0.03      | 2       | 0       | 78     |
| XY_7   | XY-887       | 46355     | 44919       |             |               |               |           | 96.3    | 90.9    | 51.    |
|        |              | 058       | 194         | 6.95        | 6.74          | 96.90         | 0.03      | 6       | 0       | 42     |

**Note:**

Sample: indicates the name of the sample

Raw reads: The number of Raw reads to be sequenced

Clean reads: Number of Clean reads obtained after filtration

Raw bases: The total bases of the Raw data are calculated by multiplying the number of Raw reads by the sequencing length, expressed in G

Clean bases: The total number of bases of the filtered data, in G

Error: Average base sequencing error rate

Q20, Q30: The percentage of bases with Phred values greater than 20 and 30 in the total base

GC: The percentage of GC bases in the total number of bases

**Supplementary table S2: Statistical description of reads information of rumen fluid metagenome of Xuyi mountain (n = 7) and Haizi (n = 10) buffaloes**

| Samples | Another name | Raw reads | Clean reads | Optimized reads | Clean raw reads (%) | Optimized in raw reads (%) | Configs | Q20(%) | Q30(%) | GC (%) |
|---------|--------------|-----------|-------------|-----------------|---------------------|----------------------------|---------|--------|--------|--------|
| HZ_1    |              | 46809744  | 46480156    | 41173098        | 99.30               | 87.96                      | 645527  | 97.29  | 92.35  | 46.1   |
| HZ_2    |              | 45002806  | 44714296    | 39068138        | 99.36               | 86.81                      | 649893  | 97.63  | 93.15  | 48.47  |
| HZ_3    |              | 43797022  | 43460744    | 38557086        | 99.23               | 88.04                      | 618628  | 97.17  | 92.11  | 46.98  |
| HZ_4    |              | 47459546  | 47111098    | 41525212        | 99.27               | 87.50                      | 705078  | 97.26  | 92.31  | 46.95  |
| HZ_5    |              | 44598970  | 44294866    | 38866356        | 99.32               | 87.15                      | 643852  | 97.34  | 92.44  | 45.65  |
| HZ_6    |              | 46390734  | 46049330    | 39421822        | 99.26               | 84.98                      | 632977  | 97.21  | 92.16  | 44.71  |
| HZ_7    |              | 47099678  | 46783650    | 40929726        | 99.33               | 86.90                      | 668680  | 97.13  | 91.92  | 45.35  |
| HZ_8    |              | 42711730  | 42448490    | 36963100        | 99.38               | 86.54                      | 565249  | 97.31  | 92.33  | 46.12  |
| HZ_9    |              | 47297486  | 46968676    | 38345146        | 99.30               | 81.07                      | 670927  | 97.41  | 92.66  | 45.76  |
| HZ_10   |              | 49862064  | 49587282    | 36687788        | 99.45               | 73.58                      | 648285  | 97.39  | 92.44  | 42.8   |
| XY_1    | XY-886       | 44925686  | 44553314    | 40732464        | 99.17               | 90.67                      | 657754  | 96.83  | 91.66  | 50.41  |
| XY_2    | XY-888       | 45171486  | 44758120    | 42290002        | 99.08               | 93.62                      | 643492  | 96.21  | 90.29  | 49.8   |
| XY      | XY           | 470704    | 465465      | 4340            | 99.01               | 92.33                      | 6282    | 96.    | 91.    | 48.    |

|    |     |     |      |     |     |      |       |       |      |     |     |     |
|----|-----|-----|------|-----|-----|------|-------|-------|------|-----|-----|-----|
| _3 | -88 | 5   |      | 090 | 413 | 5474 |       |       | 41   | 49  | 04  | 65  |
|    | 4   |     |      | 62  | 26  |      |       |       |      |     |     |     |
| XY | XY  | 6.4 |      | 432 | 428 | 4040 |       |       | 6395 | 96. | 90. | 49. |
| _4 | -60 | 8   | 6.47 | 323 | 173 | 4850 | 99.04 | 93.46 | 02   | 31  | 58  | 17  |
|    | 9   |     |      | 92  | 66  |      |       |       |      |     |     |     |
| XY | XY  | 5.9 |      | 393 | 389 | 3657 |       |       | 5292 | 96. | 90. | 49. |
| _5 | -60 | 1   | 5.89 | 740 | 841 | 6216 | 99.01 | 92.89 | 97   | 32  | 66  | 15  |
|    | 4   |     |      | 82  | 86  |      |       |       |      |     |     |     |
| XY | XY  | 6.6 |      | 442 | 438 | 4020 |       |       | 6489 | 96. | 91. | 49. |
| _6 | -80 | 4   | 6.62 | 400 | 504 | 3404 | 99.12 | 90.88 | 09   | 63  | 26  | 91  |
|    | 1   |     |      | 62  | 14  |      |       |       |      |     |     |     |
| XY | XY  | 6.1 |      | 410 | 406 | 3682 |       |       | 5792 | 96. | 90. | 49. |
| _7 | -88 | 6   | 6.15 | 815 | 607 | 6216 | 98.98 | 89.64 | 64   | 39  | 89  | 83  |
|    | 7   |     |      | 84  | 74  |      |       |       |      |     |     |     |

**Note:**

Sample: indicates the name of the sample

Raw bases: The total bases of the Raw data are calculated by multiplying the number of Raw reads by the sequencing length, expressed in G

Clean bases: The total number of bases of the filtered data, in G

Raw reads: The number of Raw reads to be sequenced

Clean reads: Number of Clean reads obtained after filtration

Optimized reads: Number of optimized sequences after removal from host

Contigs: The number of contigs in the sequence

Q20, Q30: The percentage of bases with Phred values greater than 20 and 30 in the total base

GC: The percentage of GC bases in the total number of bases
